# Supplementary material for: A DFT study of plasma-catalytic ammonia synthesis: the effect of electric fields, excess electrons and catalyst surfaces on N2 dissociation
Source: Royal Society of Chemistry journal article supplement (doi:10.1039/d2cp05052h), 2022-12-26
Supplement: d2cp05052h1.pdf [file d2cp05052h1.pdf]

# A DFT Study of Plasma-Catalytic Ammonia Synthesis: Effect of Electric Field, Excess Electrons and Catalyst Surface on N<sub>2</sub> Dissociation

*She Chen<sup>a\*</sup>, Yulei Wang<sup>ab</sup>, Qihang Li<sup>a</sup>, Kelin Li<sup>a</sup>, Mengbo Li<sup>a</sup>, Feng Wang<sup>a</sup>*

\* Corresponding authors

<sup>a</sup> College of Electrical and Information Engineering, Hunan University, 410082  
Changsha, People's Republic of China

<sup>b</sup> State Grid Zhejiang Provincial Electric Power Co., Ltd. Taizhou Power Supply  
Company, 318000 Taizhou, People's Republic of China

**Table S1** Catalyst surface dimensions: X is the horizontal length of the surface, Y is the vertical length, and S is the surface area.  $\sigma(1e)$  is the surface charge density when one electron is added to the surface, and  $\sigma(2e)$  is the surface charge density for two electrons.

| Surface          | $X$ [Å] | $Y$ [Å] | $S$ [Å <sup>2</sup> ] | $\sigma(1e)$ [C/m <sup>2</sup> ] | $\sigma(2e)$ [C/m <sup>2</sup> ] |
|------------------|---------|---------|-----------------------|----------------------------------|----------------------------------|
| Ru(0001) terrace | 13.745  | 14.284  | 196.336               | 0.081                            | 0.162                            |
| Ru(0001) step    | 13.745  | 14.284  | 196.336               | 0.081                            | 0.162                            |
| Ni(211)          | 12.190  | 14.930  | 181.998               | 0.088                            | 0.176                            |

**Table S2** The bond length, angle and adsorption energy of N<sub>2</sub> molecules on the terrace Ru (0001) surface under the combined effect of electric fields and excess electrons. In order to distinguish two N atoms, the lower N atom that forms a bond with the surface is identified as the N<sub>I</sub> atom, while the higher is N<sub>II</sub> atom.

| Voltage [V] | $r(\text{N}_I\text{-Ru})$ [Å] | $r(\text{N}_I\text{-N}_{II})$ [Å] | Angle(N-slab) [°] | $E_{\text{abs}}$ [eV] |
|-------------|-------------------------------|-----------------------------------|-------------------|-----------------------|
| 0V          | 1.965                         | 1.137                             | 92.284            | -0.90                 |
| 10V         | 1.941                         | 1.144                             | 92.708            | -1.00                 |
| 20V         | 1.922                         | 1.154                             | 93.517            | -1.20                 |
| 30V         | 1.905                         | 1.167                             | 94.982            | -1.55                 |
| 10V+1e      | 1.928                         | 1.150                             | 93.313            | -1.14                 |
| 20V+1e      | 1.910                         | 1.162                             | 93.814            | -1.42                 |
| 30V+1e      | 1.892                         | 1.179                             | 96.720            | -1.85                 |
| 0.03V+1e    | 1.948                         | 1.142                             | 92.584            | -0.96                 |
| 0.03V+2e    | 1.934                         | 1.147                             | 93.171            | -1.06                 |

**Table S3** The bond length, angle and adsorption energy of N<sub>2</sub> molecules on the stepped Ru (0001) surface under the combined effect of electric fields and excess electrons. In order to distinguish two N atoms, the lower N atom that forms a bond with the surfaces is identified as the N<sub>I</sub> atom, while the higher is N<sub>II</sub> atom.

| Voltage [V] | $r(\text{N}_I\text{-Ru})$ [Å] | $r(\text{N}_{II}\text{-Ru})$ [Å] | $r(\text{N}_I\text{-N}_{II})$ [Å] | $E_{abs}$ [eV] |
|-------------|-------------------------------|----------------------------------|-----------------------------------|----------------|
| 0V          | 2.053                         | 2.064                            | 1.318                             | -1.36          |
| 10V         | 2.058                         | 2.063                            | 1.324                             | -1.39          |
| 20V         | 2.064                         | 2.061                            | 1.329                             | -1.43          |
| 30V         | 2.074                         | 2.060                            | 1.334                             | -1.46          |
| 10V+1e      | 2.061                         | 2.061                            | 1.327                             | -1.41          |
| 20V+1e      | 2.070                         | 2.060                            | 1.332                             | -1.41          |
| 30V+1e      | 2.081                         | 2.059                            | 1.337                             | -1.46          |
| 0.03V+1e    | 2.055                         | 2.063                            | 1.322                             | -1.39          |
| 0.03V+2e    | 2.058                         | 2.061                            | 1.325                             | -1.40          |

**Table S4** The bond length, angle and adsorption energy of N<sub>2</sub> molecules on the Ni (211) surface under the combined effect of electric fields and excess electrons. In order to distinguish two N atoms, the lower N atom that forms a bond with the surface is identified as the N<sub>I</sub> atom, while the higher is N<sub>II</sub> atom.

| Voltage [V] | $r(\text{N}_I\text{-Ni})$ [Å] | $r(\text{N}_I\text{-N}_{II})$ [Å] | Angle(N-slab) [°] | $E_{\text{abs}}$ [eV] |
|-------------|-------------------------------|-----------------------------------|-------------------|-----------------------|
| 0V          | 1.770                         | 1.138                             | 115.255           | -1.08                 |
| 10V         | 1.754                         | 1.145                             | 114.312           | -1.28                 |
| 20V         | 1.744                         | 1.155                             | 114.580           | -1.57                 |
| 10V+1e      | 1.744                         | 1.153                             | 113.669           | -1.67                 |
| 20V+1e      | 1.737                         | 1.166                             | 113.733           | -2.18                 |
| 0.03V+1e    | 1.757                         | 1.144                             | 114.587           | -1.29                 |
| 0.03V+2e    | 1.745                         | 1.150                             | 114.045           | -1.46                 |

**Table S5** The bond length, angle and the dissociative adsorption energy of N atoms on the terrace Ru(0001) surface under the combined effect of electric fields and excess electrons.

| Voltage [V] | $r(\text{N-Ru})$ [Å] | $h(\text{N-slab})$ [Å] | Angle(N-Ru-N) [°] | $E_{abs}$ [eV] |
|-------------|----------------------|------------------------|-------------------|----------------|
| 0           | 1.969                | 0.906                  | 100.186           | -2.45          |
| 10          | 1.977                | 0.920                  | 99.572            | -2.57          |
| 20          | 1.983                | 0.933                  | 98.993            | -2.66          |
| 30          | 1.990                | 0.948                  | 98.410            | -2.76          |
| 10V+1e      | 1.980                | 0.925                  | 99.324            | -2.66          |
| 20V+1e      | 1.987                | 0.939                  | 98.718            | -2.75          |
| 30V+1e      | 1.995                | 0.953                  | 98.117            | -2.85          |
| 0.03V+1e    | 1.974                | 0.910                  | 99.906            | -2.56          |
| 0.03V+2e    | 1.976                | 0.914                  | 99.696            | -2.67          |

**Table S6** The bond length, angle and the dissociative adsorption energy of N atoms on the stepped Ru (0001) surface under the combined effect of electric fields and excess electrons. In order to distinguish two N atoms, the lower N atom that forms a bond with the surfaces is identified as the N<sub>I</sub> atom, while the higher is N<sub>II</sub> atom.

| Voltage [V] | $r(\text{N}_I\text{-Ru})$ [Å] | $r(\text{N}_{II}\text{-Ru})$ [Å] | $E_{abs}$ [eV] |
|-------------|-------------------------------|----------------------------------|----------------|
| 0V          | 1.914                         | 1.954                            | -2.33          |
| 10V         | 1.920                         | 1.957                            | -2.40          |
| 20V         | 1.926                         | 1.961                            | -2.48          |
| 30V         | 1.933                         | 1.965                            | -2.54          |
| 10V+1e      | 1.923                         | 1.958                            | -2.43          |
| 20V+1e      | 1.930                         | 1.962                            | -2.49          |
| 30V+1e      | 1.938                         | 1.966                            | -2.55          |
| 0.03V+1e    | 1.917                         | 1.955                            | -2.39          |
| 0.03V+2e    | 1.921                         | 1.956                            | -2.40          |

**Table S7** The bond length, angle and the dissociative adsorption energy of N atoms on the Ni (211) surface under the combined effect of different applied electric fields and excess electrons.

| Voltage [V] | $r(\text{N-Ni})$ [Å] | $E_{abs}$ [eV] |
|-------------|----------------------|----------------|
| 0V          | 1.757                | -1.56          |
| 10V         | 1.764                | -1.77          |
| 20V         | 1.774                | -1.92          |
| 10V+1e      | 1.772                | -1.92          |
| 20V+1e      | 1.780                | -2.07          |
| 0.03V+1e    | 1.762                | -1.74          |
| 0.03V+2e    | 1.768                | -1.87          |



**Table S8** Surface partial charges of N<sub>2</sub> molecules adsorbed on the surface of Ru (0001) terraces under the combined effect of electric fields and excess electrons. N<sub>I</sub> is the N atom that forms a bond with the surface metal atom, and N<sub>II</sub> atom is the one away from the surface.

| Voltage [V] | Bottom [e] | Top [e] | N <sub>I</sub> [e] | N <sub>II</sub> [e] | N <sub>2</sub> [e] |
|-------------|------------|---------|--------------------|---------------------|--------------------|
| 0           | -0.549     | -1.066  | 0.58               | -0.098              | 0.482              |
| 10V         | 0.239      | -1.777  | 0.606              | -0.197              | 0.409              |
| 20V         | 1.039      | -2.476  | 0.626              | -0.304              | 0.322              |
| 30V         | 1.83       | -3.15   | 0.639              | -0.425              | 0.214              |
| 10V+1e      | -0.268     | -2.241  | 0.62               | -0.267              | 0.353              |
| 20V+1e      | 0.53       | -2.927  | 0.636              | -0.383              | 0.253              |
| 30V+1e      | 1.34       | -3.595  | 0.646              | -0.521              | 0.125              |
| 0.03V+1e    | -1.061     | -1.539  | 0.598              | -0.162              | 0.436              |
| 0.03V+2e    | -1.572     | -2.002  | 0.614              | -0.227              | 0.387              |

**Table S9** Surface partial charges of N<sub>2</sub> molecules adsorbed on the surface of the Ru(0001) steps under the combined effect of electric fields and excess electrons. N<sub>I</sub> is the N atom that forms a bond with the surface metal atom, and N<sub>II</sub> atom is the one away from the surface.

| Voltage [V] | Bottom [e] | Top [e] | N <sub>I</sub> [e] | N <sub>II</sub> [e] | N <sub>2</sub> [e] |
|-------------|------------|---------|--------------------|---------------------|--------------------|
| 0           | -0.575     | -0.485  | -0.008             | -0.001              | -0.009             |
| 10V         | 0.299      | -1.279  | -0.038             | -0.057              | -0.095             |
| 20V         | 1.171      | -2.156  | -0.066             | -0.115              | -0.181             |
| 30V         | 2.045      | -3.021  | -0.093             | -0.174              | -0.267             |
| 10V+1e      | -0.245     | -1.775  | -0.055             | -0.089              | -0.144             |
| 20V+1e      | 0.635      | -2.649  | -0.082             | -0.148              | -0.23              |
| 30V+1e      | 1.519      | -3.521  | -0.108             | -0.209              | -0.317             |
| 0.03V+1e    | -1.12      | -0.9    | -0.025             | -0.032              | -0.057             |
| 0.03V+2e    | -1.665     | -1.385  | -0.042             | -0.063              | -0.105             |

**Table S10** Surface partial charges of N<sub>2</sub> molecules adsorbed on the surface of the Ni (211) under the combined effect of electric fields and excess electrons. N<sub>I</sub> is the N atom that forms a bond with the surface metal atom, and N<sub>II</sub> atom is the one away from the surface.

| Voltage [V] | Bottom [e] | Top [e] | N <sub>I</sub> [e] | N <sub>II</sub> [e] | N <sub>2</sub> [e] |
|-------------|------------|---------|--------------------|---------------------|--------------------|
| 0           | -0.245     | -0.933  | 0.801              | -0.134              | 0.667              |
| 10V         | 0.413      | -1.518  | 0.828              | -0.234              | 0.594              |
| 20V         | 1.082      | -2.091  | 0.844              | -0.343              | 0.501              |
| 10V+1e      | -0.073     | -1.963  | 0.844              | -0.319              | 0.525              |
| 20V+1e      | 0.601      | -2.52   | 0.851              | -0.439              | 0.412              |
| 0.03V+1e    | -0.747     | -1.39   | 0.824              | -0.212              | 0.612              |
| 0.03V+2e    | -1.236     | -1.832  | 0.841              | -0.294              | 0.547              |

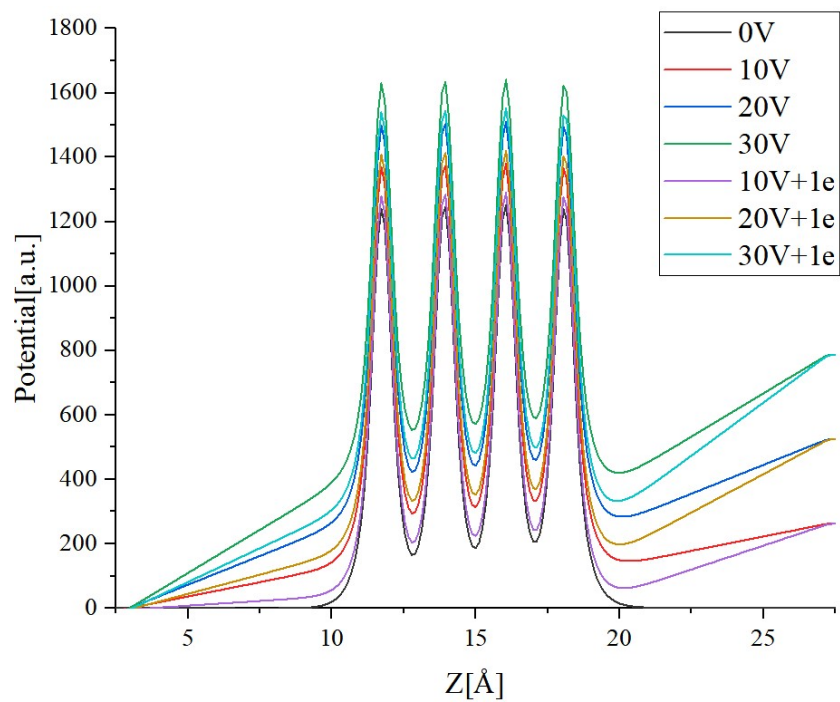

**Fig.S1** Electric potential distribution of the terrace Ru (0001) surface under the combined effect of electric fields and excess electrons.

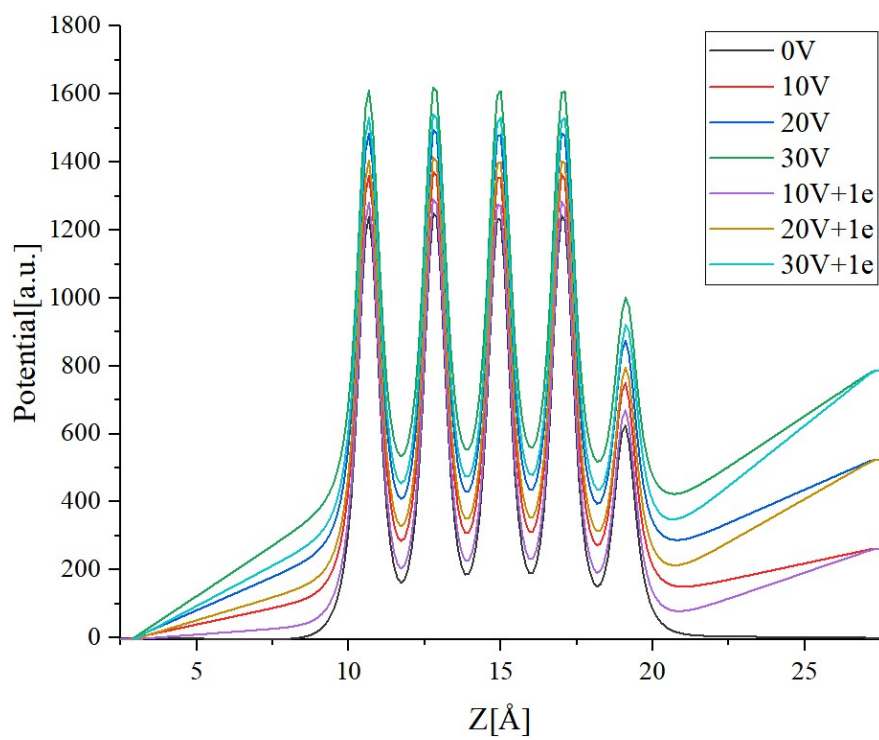

**Fig.S2** Electric potential distribution of the stepped Ru (0001) surface under the combined effect of electric fields and excess electrons.

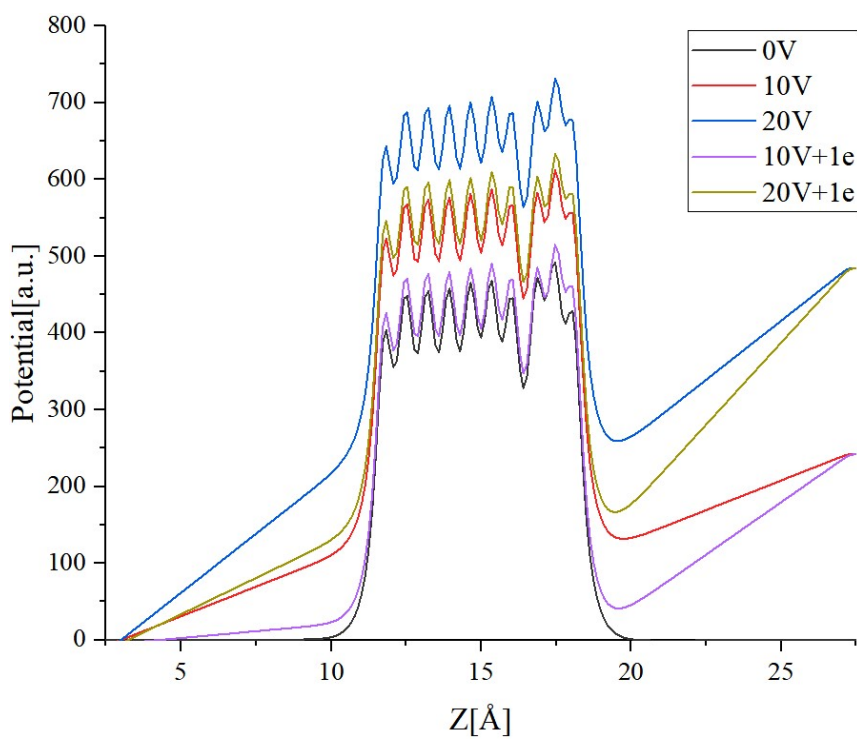

**Fig.S3** Electric potential distribution of the Ni (211) surface under the combined effect of electric fields and excess electrons.
